# Supplementary material for: Antimicrobial Resistance Policy Protagonists and Processes—A Qualitative Study of Policy Advocacy and Implementation
Source: MDPI journal article supplement (doi:10.3390/antibiotics11101434), 2022-10-18
Supplement: s1 [file s1]

**Table S1.** Coding categorized as micro-determinants of AMR policymaking.

| Level code | Sub-level code | Open coding - primary variables                                              | Sub-variables->                                                                                                                                                                                             | Axial Coding->                                                                                     | Selective coding->               | MI with meso-construct->                                                   | Policy protagonists in policy advocacy and implementation |
|------------|----------------|------------------------------------------------------------------------------|-------------------------------------------------------------------------------------------------------------------------------------------------------------------------------------------------------------|----------------------------------------------------------------------------------------------------|----------------------------------|----------------------------------------------------------------------------|-----------------------------------------------------------|
| MI         | 1              | Perceived responsibility in personal advocacy/personal championship          |                                                                                                                                                                                                             | Positive personal championship characteristics-significance of policy entrepreneurship in advocacy | Personal championship approaches | Personal championship and responsibility obligation                        | Personal obligation in personal championship              |
| MI         | 2              | Perceived personal political capacity and connections                        | 2.1. Perceived connection with international peers on AMR issues<br>2.2. Perceived importance and willing to take personal risk                                                                             | Positive personal championship characteristics particularly on politics nexus                      | Personal championship approaches | Personal championship and political connect                                | Political proximity in personal championship              |
| MI         | 3              | Perceived risk or benefits in political career                               | 3.1. Lack of political benefit<br>3.2. Beneficial to political position<br>3.3. Internal: Perceived economic priority that helps political position<br>3.4. External: Helps build international common goal | Positive personal championship characteristics                                                     | Personal championship approaches | Personal championship and incentives vs dis-incentives in political career | Political incentives in personal championship             |
| MI         | 4              | Perception of sufficient support to advocate, prioritize or formulate policy |                                                                                                                                                                                                             | Positive personal championship characteristics particularly on politics nexus                      | Personal championship approaches | Personal championship and political connect                                | Political proximity in personal championship              |
| MI         | 5              | Of opinion that AMR is a traceable problem translatable to policy            |                                                                                                                                                                                                             | Scientific evidence and knowledge channeling                                                       |                                  | Personal championship and personal belief                                  | Personal belief in personal championship                  |

|    |    |                                                                      |                                                                                                                                                                                                                                                                                               |                                                |                                  |                                                     |                                                    |
|----|----|----------------------------------------------------------------------|-----------------------------------------------------------------------------------------------------------------------------------------------------------------------------------------------------------------------------------------------------------------------------------------------|------------------------------------------------|----------------------------------|-----------------------------------------------------|----------------------------------------------------|
| MI | 6  | Perception of positive possibility to prioritize AMR on agenda       | 6.1. Of opinion that AMR is a public health gap that needs to be addressed<br>6.2. Of opinion that AMR is an intellectual challenge                                                                                                                                                           | Positive personal championship characteristics | Personal championship approaches | Personal championship and policy prioritization     | Policy prioritization                              |
| MI | 7  | Of opinion that AMR is a solvable issue                              | 7.1. Of opinion that AMR can be a common goal among international country level peers<br>7.2. Of opinion that AMR is not solvable                                                                                                                                                             | Positive personal championship characteristics | Personal championship approaches | Personal championship and belief in solvability     | Belief in solvability in personal championship     |
| MI | 8  | Of opinion that AMR aligns with decision maker's core belief         | 8.1. Personal wish to expand AMR mitigation<br>8.2. /16 Vested personal in an established AMR theme/goal by the office or society or peer<br>8.3. Vested group of aligned interest to influence agenda prioritization<br>8.4. PM interest/agenda priority<br>8.5. PM's intellectual curiosity | Positive personal championship characteristics | Personal championship approaches | Personal championship and personal belief alignment | Personal belief in personal championship           |
| MI | 9  | Of opinion that AMR is a priority within office or former office     |                                                                                                                                                                                                                                                                                               | Organization determinants                      | Organization determinants        | Personal championship and view of office commitment | Office role commitment in personal championship    |
| MI | 10 | Previous knowledge and experience influence belief in mitigating AMR |                                                                                                                                                                                                                                                                                               | Positive personal championship characteristics | Personal championship approaches | Personal championship and belief in knowledge of    | Knowledge-based incentive in personal championship |

|    |    |                                                                                               |                                                                               | AMR mitigation                                               |                                                      |                                                          |
|----|----|-----------------------------------------------------------------------------------------------|-------------------------------------------------------------------------------|--------------------------------------------------------------|------------------------------------------------------|----------------------------------------------------------|
| MI | 11 | Group of advocates/network coming together for AMR cause                                      | Organization determinants                                                     | Organization determinants                                    | Institutional characteristics and advocacy coalition | Institutional-based incentive in personal championship   |
| MI | 12 | Personal-ecostructure-advocate at an influential governmental position                        | Personal championship characteristics and organization determinants           | Relationship of personal and institutionalization connection | Personal championship                                | Institutional-based incentive in personal championship   |
| MI | 13 | Able to mobilize formal or informal organization for the AMR policy cause                     | Positive personal championship characteristics                                | Relationship of personal and institutionalization connection | Personal championship                                | Personal and political capacity in personal championship |
| MI | 14 | Change of person-in-charge or commitment(positive or negative)                                | Determinants for policy process as window of opportunity and timing of policy | Relationship of personal and institutionalization connection | Window of opportunity and timing                     | Loss of continuity in individual championship            |
| MI | 15 | Fulfil a task of the office                                                                   | Positive personal championship characteristics                                | Relationship of personal and institutionalization connection | Personal championship and role in office             | Office role commitment in personal championship          |
| MI | 16 | Vested personal interest in an established AMR theme or goal by the office or society or peer | Positive personal championship characteristics                                | Relationship of personal and institutionalization connection | Personal championship                                | Office, society, personal goal in personal championship  |
| MI | 17 | Follow up of previous effort in AMR pursuit                                                   | Positive personal championship characteristics                                | Personal championship approaches                             | Personal championship                                | Office role commitment in personal championship          |
| MI | 18 | Extend beyond personal background to accomplish task                                          | Positive personal championship characteristics                                | Personal championship approaches                             | Personal championship                                | Beyond personal obligation in personal championship      |
| MI | 19 | Confidence from knowledge and sufficient eco-structure/political support to pursue AMR policy | Positive personal championship characteristics                                | Personal championship approaches                             | Personal championship and political connect          | Political support in personal championship               |

|    |    |                                                                                                                                                             |                                                                                                                                                           |                                                |                                                                       |                                              |                                                                    |
|----|----|-------------------------------------------------------------------------------------------------------------------------------------------------------------|-----------------------------------------------------------------------------------------------------------------------------------------------------------|------------------------------------------------|-----------------------------------------------------------------------|----------------------------------------------|--------------------------------------------------------------------|
| MI | 20 | Use personal knowledge and capacity to accomplish AMR tasks                                                                                                 |                                                                                                                                                           | Positive personal championship characteristics | Personal championship approaches                                      | Personal championship                        | Use of personal knowledge in championing AMR                       |
| MI | 21 | Level of entry—opinion or assertion limitation at position (low level of in office hierarchy)                                                               |                                                                                                                                                           | Negative personal championship characteristics | Lack of positional assertion -negative trait to personal championship | Personal championship                        | Cannot mobilize positional authority nor championing the cause     |
| MI | 22 | Methodology or approach of the interviewee that contribute to success of prioritization/adaptation/enactment/implementation                                 |                                                                                                                                                           | Positive personal championship characteristics | Personal championship approaches                                      | Personal championship                        | Mobilize personal capacity in personal championship                |
| MI | 23 | Individual/organization cannot overcome hurdle/require government/another entity/another effort to overcome the hurdle/prioritize the AMR agenda or policy. | 25.1 interviewee sees potential commitment/political championship                                                                                         | Negative organization dynamics                 | Institutional limitation                                              | Shortcoming in institutional policy advocacy | Cannot mobilize organizational authority nor championing the cause |
| MI | 24 | Economics incentive to place AMR agenda a priority or at policy initiation/adaptation                                                                       | 26.1 of opinion AMR mitigation is driven by food export<br>– economic priority<br>26.2 of opinion AMR mitigation is driven by international/peer pressure | Economic determinant                           | Societal factor limits policy                                         | Social norm                                  | Economics incentive to prioritize AMR policy                       |
| MI | 25 | Personally ensure political process to follow from agenda prioritization to policy process                                                                  |                                                                                                                                                           | Positive personal championship characteristics | Personal championship approaches                                      | Personal championship and political connect  | Mobilize personal capacity to advocate policy                      |
| MI | 26 | NGO intelligence to support AMR policy                                                                                                                      |                                                                                                                                                           | Societal organisation support                  | Societal factor enables policy                                        | Social organization support                  | Mobilize NGO capacity to advocate policy                           |
| MI | 27 | Of opinion that there is insufficient evidence linking AMU and AMR                                                                                          |                                                                                                                                                           | Negative personal championship characteristics | Technical evidence fails to persuade AMR policy development           | Personal championship and personal view      | Personal view on lack of evidence                                  |

|    |    |                                                                                                                                           |                                                                                                |                                                                   |                                                                   |                                                                                  |
|----|----|-------------------------------------------------------------------------------------------------------------------------------------------|------------------------------------------------------------------------------------------------|-------------------------------------------------------------------|-------------------------------------------------------------------|----------------------------------------------------------------------------------|
| MI | 28 | Believe AMR will affect personal lives                                                                                                    | Personal championship characteristics                                                          | Qualitative technical evidence can to persuade policy development | Personal championship and personal belief                         | Personal belief applied in policy advocacy                                       |
| MI | 29 | Of opinion that AMR in the country is a problem of global issue(such as spillover, import etc)                                            | Societal and international view                                                                | Global AMR consideration from angle of societal responsibility    | Personal view on global spillover                                 | Personal view on international responsibility                                    |
| MI | 30 | Of opinion that the AMR national action plan (NAP) has/has not mentioned, facilitate different sectors to implement                       | Personal championship characteristics                                                          | Lack of implementation or factors for implementation              | Personal view on implementation shortcomings                      | Personal view on lack of sectoral persuasion on implementation                   |
| MI | 31 | Of opinion there is insufficient continuous collaboration among sectors(non-outbreak related)                                             | Societal organisation view                                                                     | Lack of implementation or factors for implementation              | Personal belief on collaboration shortcomings                     | Personal view on lack of sectoral collaboration                                  |
| MI | 32 | Of opinion that there is urgency exist internationally, (P31)and spillover to local AMR (import))                                         | Global health view on AMR                                                                      | Local AMR consideration from angle of global responsibility       | Personal belief and local view                                    | Personal view on international responsibility                                    |
| MI | 33 | of opinion that Precautionary principle as personal belief that AMR mitigation will be late when patient outbreak pandemic/endemic occurs | Precautionary principle is not sufficient to regulate AGP/Antimicrobial use ban in the country | Personal championship characteristics                             | Lag between individual awareness of AMR and AMR affecting society | Personal championship with belief on precautionary principle                     |
| MI | 34 | Of opinion that local effort should be well implemented as a model for neighbours and peers                                               | Societal organisation view                                                                     | Policy lesson learning                                            | Personal view with view on cross-country learning                 | Personal view on international policy lesson-learning                            |
| MI | 35 | Continuous (sustainable) policy is an enabler to AMR policy advocacy                                                                      | Inter-community support on AMR policy and positive feedback view                               | Policy lesson learning                                            | Personal belief and view on policy sustainability                 | Personal belief on sustainable policy as a factor to advocate for further policy |
| MI | 36 | Bilateral information exchange needed between health service                                                                              | Community cohort                                                                               | Opinion for implementation                                        | Personal championship with view on                                | Personal championship characteristics                                            |

|    |    | providers and public health providers                                                                                                |                                                                                                                                                                                                                                                         | positive feed-back view                                          |                                                                    | sectoral collaboration                                          |                                                                              |
|----|----|--------------------------------------------------------------------------------------------------------------------------------------|---------------------------------------------------------------------------------------------------------------------------------------------------------------------------------------------------------------------------------------------------------|------------------------------------------------------------------|--------------------------------------------------------------------|-----------------------------------------------------------------|------------------------------------------------------------------------------|
| MI | 37 | Positive reinforcement or personal gratification in policy-makers to initiation                                                      |                                                                                                                                                                                                                                                         | Positive personal championship characteristics                   | Personal championship approaches                                   | Personal championship and incentive                             | Personal championship characteristics                                        |
| MI | 38 | Need to balance AMR policy and country's benefit                                                                                     |                                                                                                                                                                                                                                                         | Societal organisation view and balance of priorities of policies | Local AMR consideration from angle of policy agenda prioritization | Personal championship and personal belief                       | Personal championship on policy priority responsibility on national interest |
| MI | 39 | Of opinion that nature of AMR infections and colonization is different from the tangible/direct causality/virulent diseases (eg HIV) |                                                                                                                                                                                                                                                         | Scientific evidence and knowledge direction                      | Technical consideration of AMR                                     | Personal view on AMR                                            | Personal view on nature of AMR                                               |
| MI | 40 | Of opinion that expertise opinion is needed to initiate/sustain policy                                                               |                                                                                                                                                                                                                                                         | Technocrat and expert input                                      | Resources to implement AMR policies                                | Personal view on expertise to sustain policy                    | Personal view on expertise opinion                                           |
| MI | 41 | Of opinion that the policy implementation needs to first address a country/society's basic need.                                     | a. At the moment, not addressed, especially due to limitation in LMIC<br>b. Food security not addressed<br>c. Hospital sanitation not addressed<br>d. Social hygiene concept not addressed<br>e. Patient/AM user's AM stewardship concept not addressed | Societal organisation view and balance of priorities of policies | Local AMR consideration from angle of policy agenda prioritization | Personal view on policy priority                                | Personal championship on policy priority responsibility on national interest |
| MI | 42 | Of opinion in AMR there is a lack of regulation or law-binding regulations                                                           |                                                                                                                                                                                                                                                         | Legislature support to AMR policies and goals                    | Policy effectiveness in legal-binding considerations               | Personal view on legal-binding policies to implement AMR policy | Personal view on legal-binding in AMR policy                                 |
| MI | 43 | Of opinion in AMR farm antibiotics therapeutic and prophylactic use needs clearer                                                    |                                                                                                                                                                                                                                                         | Stewardship support to AMR policies and goals                    | Policy effectiveness in clarity and precision of                   | Personal view on farm antimicrobial use                         | Personal view on farm stewardship guidelines and                             |

|    |    | definition and continuing education                                                                                                      |                                                                    | implementation and stewardship                 |                                                            | implementation of AMR policies                                                                |
|----|----|------------------------------------------------------------------------------------------------------------------------------------------|--------------------------------------------------------------------|------------------------------------------------|------------------------------------------------------------|-----------------------------------------------------------------------------------------------|
| MI | 44 | Top-down policy mismatch with policy-implementation program                                                                              | Policy implementation improvement                                  | Policy implementation lesson to learn          | View on implementation shortcomings                        | Implementation view                                                                           |
| MI | 45 | Loss of AMR policy implementation and adoption original intention                                                                        | Policy implementation improvement                                  | Policy implementation lesson to learn          | View on implementation shortcomings and original intention | Implementation view                                                                           |
| MI | 46 | Antimicrobial resistance an issue that is confused with, or attention diluted by other associated drug residue issue.                    | Scientific evidence and knowledge re-direction                     | Issue clarity                                  | Drug residue opinion                                       | Policy prioritization confusion from complexity of evidence                                   |
| MI | 47 | Of opinion that one policy for all is impractical                                                                                        | One Health perception and application in AMR                       | Policy implementation lesson to learn          | Personal view on policy diversity                          | Single-policy approach view                                                                   |
| MI | 48 | Of opinion it is difficult to have representative voice due to large population(farm)                                                    | Societal organisation view                                         | Policy implementation lesson to learn          | Personal view on policy representativeness and coverage    | Personal view on policy representativeness and hurdle in advocacy and implementation in farms |
| MI | 49 | Of opinion ethical and moral obligation will not establish policy implementation                                                         | Of opinion that moral and ethical obligation requires development  | Policy persuasion and AMR policy advocacy view | Policy implementation lesson to learn                      | Personal view on implementation shortcomings relying on moral obligation                      |
| MI | 50 | Lack of evidence to support behavioral change to implement AMR education for patients.                                                   | Negative evidence-based for policy advocacy in defined communities | Policy implementation lesson to learn          | Personal view on policy evidence in education programs     | Personal view on lack of evidence in AM stewardship implementation                            |
| MI | 51 | Believe that providers will change behavior if they are given sufficient knowledge regarding preventive medicine as oppose to treatment. | Scientific evidence and knowledge channeling                       | Policy implementation lesson to learn          | Personal view on knowledge-based behavioral change         | Personal view on knowledge-based behavioral change                                            |

Table S2. Coding categorized as macro-determinants of AMR policymaking.

| Level | Sub-level code | Open coding - primary variables                    | Sub-variables-->                                                                                                                                                                                                                                   | Axial Coding-->                                                                                                                        | Selective coding-->                                                                       | MA with meso-construct-->                         | Policy protagonists in policy advocacy and implementation |
|-------|----------------|----------------------------------------------------|----------------------------------------------------------------------------------------------------------------------------------------------------------------------------------------------------------------------------------------------------|----------------------------------------------------------------------------------------------------------------------------------------|-------------------------------------------------------------------------------------------|---------------------------------------------------|-----------------------------------------------------------|
| MA    | 1              | Social influence and norm                          | 1.1 Created social influence from MI<br>1.2 Lack of social norm or urgency<br>1.3 Social fatigue<br>1.3.1 Time-prolonged timeframe/ chronic duration<br>AMR issues span over<br>1.3.2 Difficult to sustain interest<br>1.4 Lack of face to problem | Social influence and timing of policy, duration of policy or closed window of opportunity                                              | Timing and lack of policy window that was originally held out by a small group in society | Personal championship and policy window discourse | Personal championship in social context                   |
| MA    | 2              | International organization influence               | 2.1 International agencies overcome HR shift at government<br>2.2 From country based to prioritize at UN agenda                                                                                                                                    | Policy durability discussion in framework of international agencies and advocacy                                                       | International agency appear to hold out policy window longer and wider than local effort. | Institutionalized advocacy at international level | Institutionalization                                      |
| MA    | 3              | Economic influence and pressure                    | 3.1 Economic viability<br>3.2 Economic barrier<br>3.3 Economic incentives for market(Eg Market Entry Rewards)                                                                                                                                      | Institutional or personal persuasion in view of economics trade off perceived in AMR policy development                                | Policy persuasion and durability                                                          | Personal championship characteristics             | Personal championship in economic context                 |
| MA    | 4              | Resources and capacity availability and limitation |                                                                                                                                                                                                                                                    | Policy durability discussion in framework of resource availability and contentious resource investment on policy agenda prioritization | Lack of resources for policy implementation                                               | Shortfall in implementation                       | Implementation discourse                                  |



|    |   |                                                     |                                                                                                                                        |                                                                                     |                                                                              |                             |                          |
|----|---|-----------------------------------------------------|----------------------------------------------------------------------------------------------------------------------------------------|-------------------------------------------------------------------------------------|------------------------------------------------------------------------------|-----------------------------|--------------------------|
| MA | 5 | Legislation ease, hurdles, political climate        | 5.1 Government change (in framework/approach/priority) leading to changes in private industry                                          | Policy implementation discussion from political stance.                             | Institutional and industrial support challenges                              | Shortfall in implementation | Implementation discourse |
|    |   |                                                     | 5.2 Private industry change (in framework/approach/priority/operando guideline) leading to change in government approach/priority      |                                                                                     |                                                                              |                             |                          |
|    |   |                                                     | 5.3 Political support from within government/institution                                                                               |                                                                                     |                                                                              |                             |                          |
| MA | 6 | Collaboration or isolation among different office   | 6.1 Collaboration among different sectors                                                                                              | Implementation of policy in framework of collaboration among sectors                | Policy persuasion, durability, and implementation                            | Shortfall in implementation | Implementation discourse |
|    |   |                                                     | 6.2 Collaboration within sectors                                                                                                       |                                                                                     |                                                                              |                             |                          |
| MA | 7 | Consensus, entities and organization within country | 7.1 Create consensus/consensus among different offices, entities and organization within country                                       | Implementation of policy in framework to seek consensus among sectors               | Policy persuasion, durability, and implementation difficulties among sectors | Shortfall in implementation | Implementation discourse |
|    |   |                                                     | 7.2 Unable to create consensus/consensus among different offices, entities and organization within country                             |                                                                                     |                                                                              |                             |                          |
|    |   |                                                     | 7.3 Shift of consensus among different offices, entities and organization within country or isolation with other countries and regions |                                                                                     |                                                                              |                             |                          |
|    |   |                                                     | 7.4 Office collaboration a hurdle to AMR policy process/implementation                                                                 |                                                                                     |                                                                              |                             |                          |
| MA | 8 | Global and regional collaboration                   | 8.1 Create consensus/consensus between countries and regions                                                                           | Implementation of policy in framework to seek consensus among countries and regions | Implementation difficulties among countries and localities                   | Shortfall in implementation | Implementation discourse |
|    |   |                                                     | 8.2 Unable to Create consensus/consensus between countries and regions                                                                 |                                                                                     |                                                                              |                             |                          |
|    |   |                                                     | 8.3 Help prioritize the issue globally                                                                                                 |                                                                                     |                                                                              |                             |                          |
|    |   |                                                     | 8.4 Between-country synchronization- AMR mitigation as common policy goal                                                              |                                                                                     |                                                                              |                             |                          |
|    |   |                                                     | 8.5 Help prioritize issue in a particular country                                                                                      |                                                                                     |                                                                              |                             |                          |
| MA | 9 | Professional support or hurdle                      | 9.1 Enabler from professional/industrial collaboration or consensus                                                                    | Implementation of policy in                                                         | Implementation enablers with                                                 | Shortfall in implementation | Implementation discourse |

|       |                                                                             |                                                                                                                                                                                                                                                                                           |                                                                                     |                                                                                    |                                                 |                                                      |
|-------|-----------------------------------------------------------------------------|-------------------------------------------------------------------------------------------------------------------------------------------------------------------------------------------------------------------------------------------------------------------------------------------|-------------------------------------------------------------------------------------|------------------------------------------------------------------------------------|-------------------------------------------------|------------------------------------------------------|
|       |                                                                             | 9.2 Barrier from lack of professional/industrial collaboration or consensus                                                                                                                                                                                                               | framework to seek support from professional bodies                                  | professional support                                                               |                                                 |                                                      |
| MA 10 | Cultural, historical, geographical and anthropological contextual influence | 10.1 Enabler from cultural, historical, geographical and anthropological contextual influence<br>10.2 Barrier from cultural, historical, geographical and anthropological contextual influence                                                                                            | Cultural and historical factors in policy advocacy                                  | Ethnographic, cultural, and socio-economic inhibitors and enablers of AMR policies | Personal championship and social norm discourse | Personal championship in cultural and social context |
| MA 11 | Disease and resistance patterns                                             | 11.1 Enabler from presence or construction of surveillance system<br>11.2 Barrier from lack of surveillance system<br>11.3 Public health as a primary motivation to prioritize AMR<br>11.4 Barrier from lack of surveillance system coordination/sharing among different sectors/industry | Surveillance data as part of technical evidence for policy advocacy and development | Support to policy advocacy and implementation                                      | Shortfall in implementation                     | Implementation discourse                             |
| MA 12 | Multiple levels or widespread HR or eco-structure support                   |                                                                                                                                                                                                                                                                                           | Governance establishment as support to AMR policy advocacy                          | Support to policy advocacy and implementation                                      | Shortfall in implementation                     | Implementation discourse                             |
| MA 13 | Brand and recognition of AMR role of leadership                             |                                                                                                                                                                                                                                                                                           | Leadership style and personal championship in an institution                        | Institutional support                                                              | Institutionalized advocacy                      | Institutionalization                                 |
| MA 14 | Timeline management and operational space permissible                       |                                                                                                                                                                                                                                                                                           | Time as frame of reference for AMR policy advocacy                                  | Window of opportunity for policy advocacy in terms of organization                 | Institutionalized advocacy                      | Institutionalization                                 |
| MA 15 | Knowledge exchange(d) at national and international level                   |                                                                                                                                                                                                                                                                                           | National and international dynamics in AMR policy advocacy                          | Window of opportunity for policy advocacy in terms of international and national   | Institutionalized advocacy                      | Institutionalization                                 |

|       |                                                                       | agencies as a unit                                                                                                                                                                                                                                                                            |                                                                                                                    |                                                                                         |                                         |                          |
|-------|-----------------------------------------------------------------------|-----------------------------------------------------------------------------------------------------------------------------------------------------------------------------------------------------------------------------------------------------------------------------------------------|--------------------------------------------------------------------------------------------------------------------|-----------------------------------------------------------------------------------------|-----------------------------------------|--------------------------|
| MA 16 | Feasible social atmosphere                                            | lack of feasible atmosphere occurs in some LMIC and communities with contending vested interests                                                                                                                                                                                              | Social influence on AMR policy advocacy                                                                            | Social determinant                                                                      | Social norm                             | Social norm              |
| MA 17 | Cultural difference                                                   | 17.1 Country cultural difference<br>17.2 Individual-to-cultural difference<br>17.3 Government culture<br>17.4 Professional culture<br>17.5 Industrial culture<br>17.6 Public health and health culture                                                                                        | Cultural and historical factors in AMR policy advocacy                                                             | Contextual variation across culture, social, and ethnographic in AMR policy development | Social norm                             | Social norm              |
| MA 18 | Quasi-government influence                                            |                                                                                                                                                                                                                                                                                               | Governance establishment as support to AMR policy advocacy                                                         |                                                                                         | Institutionalized advocacy              | Institutionalization     |
| MA 19 | Organizational behavior                                               | 19.1 Change of government/organization/industry/institution operational framework<br>19.2 Inertia of government/organization/industry/institution operando framework<br>19.3 Lack of mutual urgency between organisations<br>19.4 Interest/pre-existing preparedness to initiate/adapt policy | Organizational discourse and lack of memory de-AMR policy advocacy continuity especially passing on among agencies | Window of opportunity and organizational challenges determines policy acceptance.       | Shortfall of institutionalized advocacy | Institutionalization     |
| MA 20 | Lack of granularity in policy/program                                 |                                                                                                                                                                                                                                                                                               | Policy ambiguity lowers persuasive capacity of policy especially implementing programs with conflict of interests  | Policy persuasion, durability, and implementation difficulties among stakeholders       | Shortfall in implementation             | Implementation discourse |
| MA 21 | Diminished/diminishing financial interest in institution/organization |                                                                                                                                                                                                                                                                                               | Financial disincentive reduces policy                                                                              | Financial determinant                                                                   | Financial conflict of interest          | Implementation discourse |

|    |    |                                                        |                                                                                                                                                      |  |                                                                                                                                                                        |                                                                                                                                       |                                                                                          |                                                                                |
|----|----|--------------------------------------------------------|------------------------------------------------------------------------------------------------------------------------------------------------------|--|------------------------------------------------------------------------------------------------------------------------------------------------------------------------|---------------------------------------------------------------------------------------------------------------------------------------|------------------------------------------------------------------------------------------|--------------------------------------------------------------------------------|
|    |    |                                                        |                                                                                                                                                      |  | durability<br>in organiza-<br>tion                                                                                                                                     |                                                                                                                                       |                                                                                          |                                                                                |
| MA | 22 | Agency-mis-<br>match                                   |                                                                                                                                                      |  | Agency<br>with differ-<br>ent policy<br>goals or<br>considera-<br>tion deters<br>policy ad-<br>vocacy                                                                  | Institutional<br>and indus-<br>trial support<br>challenges                                                                            | Shortfall in in-<br>stitutionaliza-<br>tioned advo-<br>cacy                              | Institutionali-<br>zation                                                      |
| MA | 23 | Cooperate re-<br>sponsibilities                        | 23.1 See AM responsibility as<br>social good<br>23.2 Cooperate culture<br>23.3 Cooperate leadership                                                  |  | Social good<br>and cooper-<br>ate culture<br>affects pol-<br>icy advo-<br>cacy                                                                                         | Cooperate<br>culture af-<br>fects policy<br>advocacy                                                                                  | Social norm                                                                              | Social norm                                                                    |
| MA | 24 | Individual ca-<br>pacity captured<br>into organization |                                                                                                                                                      |  | Individual<br>champion-<br>ship and in-<br>stitutional<br>alignment<br>is crucial                                                                                      | Personal<br>champion-<br>ship and in-<br>stitutional<br>culture                                                                       | Personal cham-<br>pionship and<br>policy window<br>alignment                             | Personal cham-<br>pionship and in-<br>stitutional<br>alignment                 |
| MA | 25 | Government in-<br>terest enabler                       | 25.1 perceived benefit to be<br>leader in field<br>25.2 perceived benefit to food<br>chain safety<br>25.3 perceived benefit to social<br>norm change |  | Political in-<br>terest in<br>government<br>as a unit                                                                                                                  | Political de-<br>terminant                                                                                                            | Political per-<br>suasion                                                                | Institutionali-<br>zation chal-<br>lenges                                      |
| MA | 26 | International<br>country-based<br>enabler              |                                                                                                                                                      |  | Policymak-<br>ing among<br>interna-<br>tional agen-<br>cies and na-<br>tional of-<br>fices need<br>to coincide<br>in terms of<br>entrepre-<br>neurs com-<br>munication | Personal<br>champion-<br>ship and in-<br>ternational<br>institutional<br>culture                                                      | Personal cham-<br>pionship and<br>institutional-<br>ized policy<br>window align-<br>ment | Personal cham-<br>pionship and in-<br>ternational<br>institutional<br>advocacy |
| MA | 27 | Media as an ena-<br>bler                               |                                                                                                                                                      |  | Media in-<br>fluences<br>consumer<br>especially<br>in food<br>safety re-<br>lated to<br>AMR                                                                            | Policy im-<br>plementa-<br>tion chal-<br>lenges in<br>persuading<br>public to pay<br>for "antibi-<br>otic-free"<br>food prod-<br>ucts | Social norm                                                                              | Social norm                                                                    |

|    |    |                                                                                 |                                                                                                                                             |                                                                                       |                                                                       |                                          |                                                   |
|----|----|---------------------------------------------------------------------------------|---------------------------------------------------------------------------------------------------------------------------------------------|---------------------------------------------------------------------------------------|-----------------------------------------------------------------------|------------------------------------------|---------------------------------------------------|
| MA | 28 | Delayed real-time report in surveillance system                                 |                                                                                                                                             | Surveillance data as part of technical evidence for policy advocacy and development   | Deterrant of surveillance system as an AMR investment                 | Shortfall in institutionalized resources | Institutionalization                              |
| MA | 29 | Delayed AMR process due to administrative or other resources or infrastructure  | 29.1 Administrative process<br>29.2 Lack of knowledge<br>29.3 Lack of resources<br>29.4 Lack of public education<br>29.5 Lack of regulation | Implementation deterrent                                                              | Implementation deterrent                                              | Shortfall of institutionalized advocacy  | Institutionalization                              |
| MA | 30 | Need for pharmaceutical research                                                |                                                                                                                                             | Innovation challenges                                                                 | Incentive and resource limitation                                     | Shortfall in institutionalized resources | Institutionalization                              |
| MA | 31 | Longer term planning for NAP needed                                             |                                                                                                                                             | Implementation challenge result from planning gaps                                    | Policy amnesia and durability challenge                               |                                          | Institutionalization challenges                   |
| MA | 32 | Specialist engagement in AMR policies needed                                    |                                                                                                                                             | Expertise' role in AMR evidence interpretation for policy advocacy and implementation | Personal championship and institutional culture                       |                                          | Personal championship and institutional alignment |
| MA | 33 | International collaboration and implementation at international level essential |                                                                                                                                             | International institutional persuasion cannot overcome local policy amnesia           | Institutional and local policy durability challenge                   | Shortfall in institutionalized advocacy  | Institutionalization challenges                   |
| MA | 34 | Unique country background in general                                            |                                                                                                                                             | Ethnographic and cultural differences affects policy advocacy consideration           | Policy development needs cultural and ethnic contextual consideration | Shortfall in social norm                 | Social norm                                       |
| MA | 35 | Championship – group championship                                               |                                                                                                                                             | Advocacy coalition consideration                                                      | Advocacy coalition                                                    | Coalition advocacy                       | Coalition advocacy                                |

|       |                                                                                               |                                                                                                                         |                                                                                                                 |                                                                                          |                                                   |                                                   |
|-------|-----------------------------------------------------------------------------------------------|-------------------------------------------------------------------------------------------------------------------------|-----------------------------------------------------------------------------------------------------------------|------------------------------------------------------------------------------------------|---------------------------------------------------|---------------------------------------------------|
| MA 36 | Leadership is important                                                                       |                                                                                                                         | Personal championship and political alignment                                                                   | Policy entrepreneurship                                                                  | Personal championship and policy window alignment | Personal championship in political context        |
| MA 37 | Cultural change over period of time                                                           |                                                                                                                         | Timing and cultural determinant                                                                                 | Timing and communication approach influenced by local culture and etiquette              | Personal championship and policy window alignment | Personal championship in policy window and timing |
| MA 38 | Nation/country-based perspective and economic/GDP improvement                                 | Nation-based size—difficulty due to large size of country/ease due to small size of country/population                  | AMR policy advocacy reach limitation due to diverse demographics or large population and social characteristics | National characteristics influence AMR policy advocacy outcome                           | Shortfall in implementation                       | Implementation discourse                          |
| MA 39 | Country based varying approach to AGP (banning, restricted use, permit to use)                |                                                                                                                         | Farming characteristics affect AMR policy effectiveness                                                         | Country with different farming culture and infrastructure influences AMR policy advocacy | Social norm and shortfall in implementation       | Social norm                                       |
| MA 40 | Lack of surveillance data and situation analysis—therefore lack of implementation of policies |                                                                                                                         | Surveillance data as part of technical evidence for policy advocacy and development                             | Implementation challenge from lack of evidence                                           | Shortfall in implementation                       | Implementation discourse                          |
| MA 41 | Food security an issue                                                                        | Better lifestyle in Low- to middle-income countries lead to an increase in AMU in farms to raise food-producing animals | Controversial AMU regulation policies in farm animals and animal                                                | Lack of persuasion or high resistance in AMU policy at implementation stage              | Social norm and shortfall in implementation       | Social norm                                       |

|       |                                                                                                                                                 |                                                                                                               |                                                                                                              |                                             |                                |
|-------|-------------------------------------------------------------------------------------------------------------------------------------------------|---------------------------------------------------------------------------------------------------------------|--------------------------------------------------------------------------------------------------------------|---------------------------------------------|--------------------------------|
|       |                                                                                                                                                 | protein production                                                                                            |                                                                                                              |                                             |                                |
| MA 42 | Country-based-cultural and political choice on international peer pressure eg close door policy                                                 | Pros and cons relying on cross-country policy learning                                                        | Cultural and political sensitivity across countries affects AMR policy advocacy approach                     | Inter-national norm                         | International support          |
| MA 43 | Country-based consumer culture difference                                                                                                       | Consumer culture                                                                                              | Implementation challenge from sufficient or lack of consumer support                                         | Social norm and shortfall in implementation | Social norm                    |
| MA 44 | Country-based media involvement                                                                                                                 | Media influences consumer especially in food safety related to AMR                                            | Media influence                                                                                              | Media and implementation characteristics    | Implementation characteristics |
| MA 45 | Country-based improvement in public health representation in society                                                                            | Governance establishment as support to AMR policy advocacy                                                    | Public health governance and baseline affects how much or little AMR policy advocacy can be established      | Institutionalized advocacy                  | Institutionalization           |
| MA 46 | Country level financial support to improve farm conditions, hygiene and technology (a financial incentive for the nation with export commodity) | Financial status of food-animal production as an industry affects willingness to accept AMU regulation policy | AMR policy window of opportunity influenced by baseline well-being of food-producing animal farming industry | Implementation consideration                | Implementation characteristics |

Table S3. Interview themes, sub-themes, quote identifier, and quotes.

| Main themes                                                                                        | Sub-themes                                                                                                                                                                                                   | Quot<br>es<br>Num<br>bers | Interview quotes                                                                                                                                                                                                                                                                                                                                                                                                                                                                                                                                                                                                            |
|----------------------------------------------------------------------------------------------------|--------------------------------------------------------------------------------------------------------------------------------------------------------------------------------------------------------------|---------------------------|-----------------------------------------------------------------------------------------------------------------------------------------------------------------------------------------------------------------------------------------------------------------------------------------------------------------------------------------------------------------------------------------------------------------------------------------------------------------------------------------------------------------------------------------------------------------------------------------------------------------------------|
| 2.1 Individual champion-<br>ship is pivotal but in-<br>sufficient in the AMR<br>policymaking arena | 2.1a Difficult policy<br>implementation                                                                                                                                                                      | 2.1.1                     | "If I had chance to redo- the whole process, I would have included policy implementation in the whole push for policies among countries. The implementation has been stalled. We have suc-cessfully pushed for AMR policies in some countries but the implementation in the country has not been successful in many." (UK)                                                                                                                                                                                                                                                                                                  |
|                                                                                                    |                                                                                                                                                                                                              | 2.1.2                     | "...But I also think the system did not quite put things to-<br>gether into a longer term,...sort of UK's own plan but not<br>enough how we are going to the world in driving this<br>whole thing through. So to me there is two phases actu-<br>ally. I think it was easier to do the first bit than people re-<br>alized, but harder to do the second bit sort of putting stuff<br>in practice." (UK)                                                                                                                                                                                                                     |
|                                                                                                    |                                                                                                                                                                                                              | 2.1.3                     | "..it is a combination of lack of understanding, technically<br>complicated and who holds the power. And we all know<br>the finance ministries hold the power and they have not<br>bought this yet and health ministers hold no power at<br>all...and the Agriculture ministers not wanting to move<br>into this because it threatens their food chains and their<br>private sectors are saying, "no don't go there." (UK)                                                                                                                                                                                                  |
|                                                                                                    |                                                                                                                                                                                                              | 2.1.4                     | "..we do not have this stable basis of political support and<br>we do not have the public mandate necessarily to achieve<br>that...that becomes particular important once we start<br>heading into kind of more difficult questions around how<br>to fund things." (US)                                                                                                                                                                                                                                                                                                                                                     |
|                                                                                                    | 2.1b AMR policy<br>protagonists who<br>were allowed to ad-<br>vice policy at stages<br>of policy ini-tiation<br>and formulation<br>helped converge<br>public, professional,<br>and policy perspec-<br>tives. | 2.1.5                     | "..I think the key driver, to my mind was [the] Chief Medi-<br>cal Officer,...as I saw it, the opening of that (AMR) con-<br>versation and escalating it to a government, cross-govern-<br>ment level and a political priority,..." To move AMR at<br>the international space, "...a couple of strands that was do-<br>mestic conversation..., and the backing of government, for<br>it (AMR prioritization) to be effective,...the idea of taking<br>some action on this at global level, moving out of that<br>technical, medical space and bring it into the political<br>arena." (UK)                                   |
|                                                                                                    |                                                                                                                                                                                                              | 2.1.6                     | "...we have levels of connectivity that supersede the polit-<br>ical sphere...we had very very strong high level White<br>House support during the Obama administration that less-<br>ened during Trump administration. Secretary is bound<br>and determined he wants to bring..economic incentive to<br>help antibiotic discovering commercialization before he<br>leaves. So, you know, the political are very very involved.<br>Under that there is a level of senior executive service like<br>myself who..going to say 7 out of 13 originals were part of<br>the effort in 2014, and still in place. And then you have |



|                                                                                          |                                          |                                                                                                                                                                                                                                                                                                                                                                                                                                                                                                                                                                                                                                                                                                   |
|------------------------------------------------------------------------------------------|------------------------------------------|---------------------------------------------------------------------------------------------------------------------------------------------------------------------------------------------------------------------------------------------------------------------------------------------------------------------------------------------------------------------------------------------------------------------------------------------------------------------------------------------------------------------------------------------------------------------------------------------------------------------------------------------------------------------------------------------------|
|                                                                                          |                                          | staff level engagement that is literally day-to-day talking with their counterparts. But that has been built over time.” (US)                                                                                                                                                                                                                                                                                                                                                                                                                                                                                                                                                                     |
|                                                                                          |                                          | “...in China, it's not like this. I know the United Kingdom, in the United States, there is a presidential Department committee doing this. In China, there is not such a high steering committee, ... a cross-departmental institution that is higher than the Department, it may not be realistic in the short term, first of all, the understanding of 2.1.7 AMR issue, and for the management department to understands, may also need to continue to educate them, ... understanding them, this is very important.<br>AND<br>“...my personal comment on NAP is it should involve food safety, the preparation (of NAP) is very short...the food safety department was not involved.” (China) |
|                                                                                          |                                          | 2.1.8 “...it's not that easy to push the establishment of a higher level of interdepartmental (AMR) coordination”(China)                                                                                                                                                                                                                                                                                                                                                                                                                                                                                                                                                                          |
|                                                                                          |                                          | “...main role of the institute is to provide facts and information and knowledge about the AMR problem in Norway. And we are also an advisor for the government and also for the health sector, especially the human health sector. The institute is also a research institute, that has a role in establishing research projects and establishing networks with other institutions, universities, high schools and also networks across with the research groups in other countries.” (Norway)                                                                                                                                                                                                   |
|                                                                                          |                                          | 2.2.1 “...continuation is most important. We need people to ensure continuation. I think it is important to create an environment and a mechanism on site, where people can be involved in AMR, and to foster human development...” (Japan)                                                                                                                                                                                                                                                                                                                                                                                                                                                       |
| 2.2 Policy institutionalization facilitates AMR policy prioritization and implementation | 2.2a Institutionalisation plays key role | 2.2.2 “...the change of administration we definitely saw a deprioritization...decrease in budget and staff size. I assume when another administration comes along that may change. While the CDC (human) and USDA (foodborne sector) pick up the slack, they focused the attention on people who are specialists within the environment from academia and the private sector who could help at least articulate in the form of report...and major questions that need to be addressed to help with policymaking...” (US)                                                                                                                                                                          |
|                                                                                          |                                          | 2.2.3 “...evolving..it has been hard to mobilize the interest within the White House that we used to have. Part of that is because the changeover in staff, no one actually was assigned to the AMR portfolio. And so when you do not have somebody who was covering it day in and day out and actually pushing the policy agenda it reverted to the departments and agencies doing all the work. And that is, it is just a different type of process...” (US)                                                                                                                                                                                                                                    |
| 2.3 Free markets play an ambivalent role while social norm a driver in AMR policymaking  |                                          | 2.3.1 “..if (AMU in animals) are tightened too much, animal husbandry will decline, and large quantities of foreign                                                                                                                                                                                                                                                                                                                                                                                                                                                                                                                                                                               |

---

products will be on the market in Japan, whose food self-sufficiency rate is already low." (Japan)

---

2.3.2 "For basic public education, "...it has to be among younger generation,...I channeled private funding to facilitate public awareness program." (China)

---

2.3.3 Across countries, economic incentive link or delink in medical insurance infrastructure, reimbursement policies, and hospital income generation were used to change social behavior and implement AMR stewardship programs. Interviewees from pharmaceutical leadership opined financial dis-incentives, however, have relegated pharmaceutical innovations efforts.

---

2.3.4 "So you are never going to come up when they (president) are campaigning. So to get this political will thing to work and get real champions its... money. Money talks here and when reimbursement policies really come down to that reinforce these policies, then there will be change. Secondly, are the stories that can be told. Particular when influential people have family members or loved one or even themselves have been impacted by these diseases." (US)

---

2.3.5 "I think the major incentive in the United States comes from the payer. That is insurance company. Because the hospitals and providers to be reimbursed...Medicare rule that reimbursement must have antimicrobial use policies in place". (US)

---

2.3.6 "... public education needs to be supported with change of mentality on intravenous drip and antibiotics use on treating fever...to stop linking income with medicine use is the most important." and "...Medicine charges are a large piece of medical income...doctors need to sustain services to improve medical services." (China)

---

2.3.7 "...pharma innovation.. this kind of conversation has been going on and not really getting into the details and implementation,..they are now hitting point where investor confidence is tailing off and they are running out of money.." (UK)

---
